# Supplementary material for: Tracing the epidemic history of HIV-1 CRF01_AE clusters using near-complete genome sequences
Source: PubMed Central journal article supplement (PMC5481428; doi:10.1038/s41598-017-03820-8), 2017-06-22
Supplement: 41598_2017_3820_MOESM1_ESM.pdf [file 41598_2017_3820_MOESM1_ESM.pdf]

## **Tracing the epidemic history of HIV-1 CRF01\_AE clusters using near-complete genome sequences**

Xingguang LI<sup>1, 2, #</sup>, Haizhou LIU<sup>3, #</sup>, Lu LIU<sup>4, 5, #</sup>, Yi FENG<sup>1, 2</sup>, Marcia L. KALISH<sup>6</sup>,  
Simon Y. W. HO<sup>7</sup> and Yiming SHAO<sup>1, 2</sup>

1. State Key Laboratory for Infectious Disease Prevention and Control, National Center for AIDS/STD Control and Prevention, Chinese Center for Disease Control and Prevention, Beijing, China.
2. Collaborative Innovation Center for Diagnosis and Treatment of Infectious Diseases, Hangzhou, Zhejiang, China.
3. Centre for Emerging Infectious Diseases, The State Key Laboratory of Virology, Wuhan Institute of Virology, University of Chinese Academy of Sciences, Wuhan, China.
4. Shantou University Medical College, Shantou 515041, China.
5. College of Veterinary Medicine, South China Agricultural University, Guangzhou 510642, China.
6. Vanderbilt Institute for Global Health, Vanderbilt University School of Medicine, Nashville, Tennessee, USA.
7. School of Life and Environmental Sciences, University of Sydney, Sydney, New

South Wales 2006, Australia.

Corresponding author:

Yiming SHAO, Division of Research on Virology and Immunology, National Center for AIDS/STD Control and Prevention, Chinese Center for Disease Control and Prevention, No. 155 Changbai Road, Changping District, Beijing 102206, China. Tel: +86 10 58900981; Fax: +86 10 58900980; E-mail: yshao08@gmail.com.

Condensed Title: The epidemic history of HIV-1 CRF01\_AE clusters

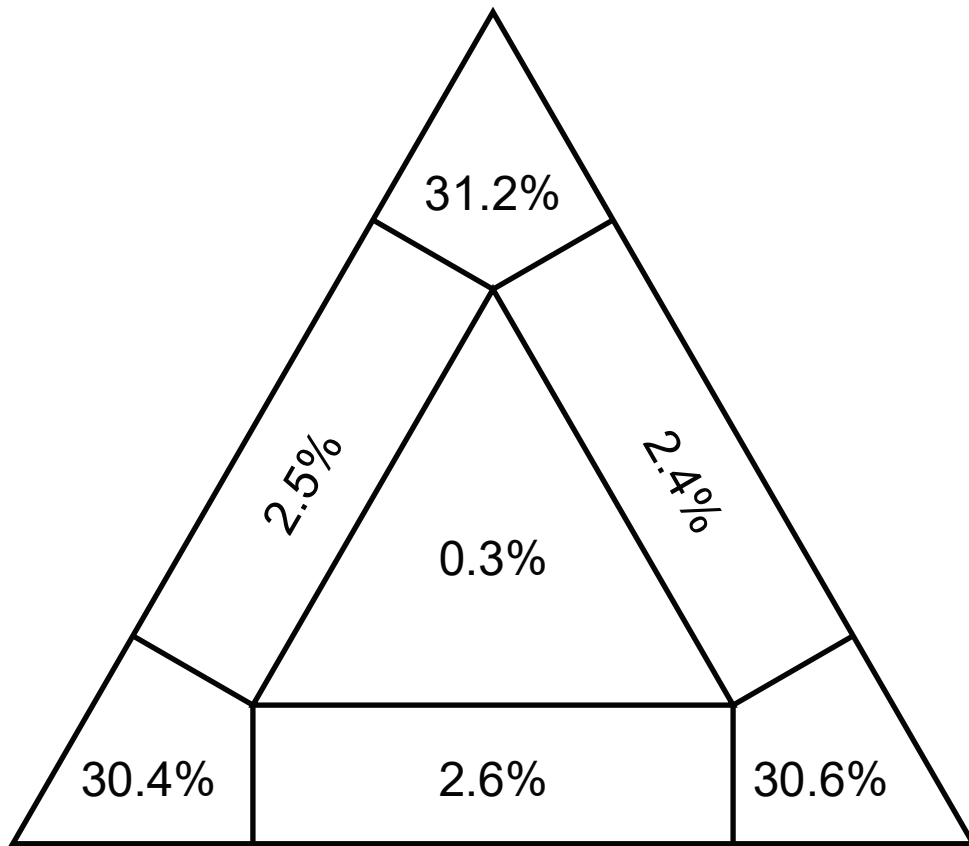

**Supplementary Figure S1. Likelihood-mapping analyses of near-complete genome sequences of HIV-1 CRF01\_AE.** The likelihoods of the three tree topologies of each possible quartet (or of a random sample of quartets) are denoted by a data point in an equilateral triangle. The distribution of points in the seven areas of the triangle reflects the tree-likeness of the data. Specifically, the three corners represent fully resolved tree topologies; the center represents an unresolved (star) phylogeny; and the sides represent support for conflicting tree topologies.

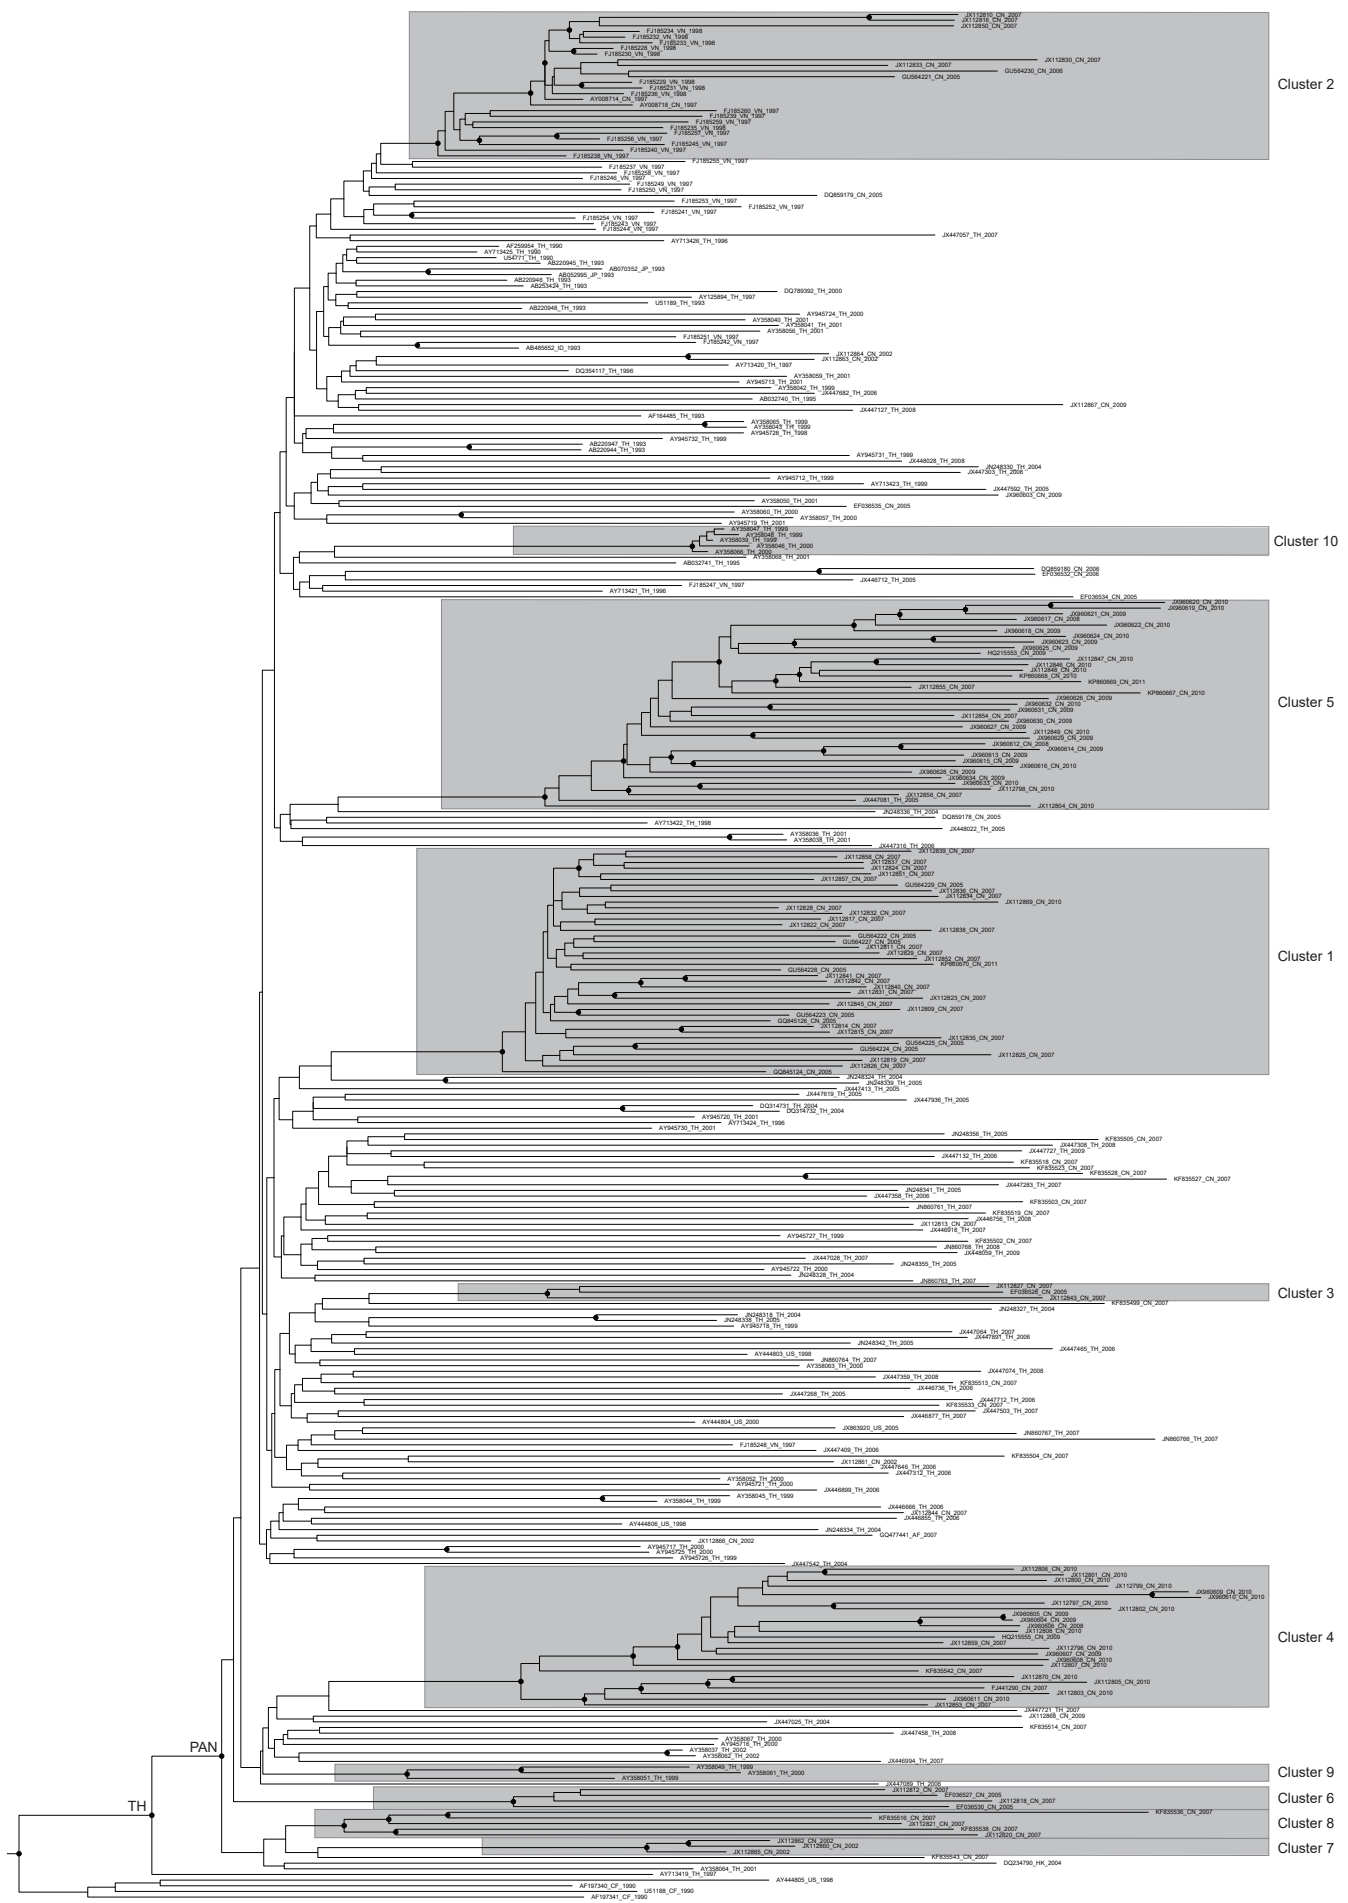

0.02

**Supplementary Figure S2. Phylogenetic relationships of near-complete genome sequences from HIV-1 CRF01\_AE.** The tree was inferred using a maximum-likelihood analysis of 334 near-complete genome sequences of HIV-1 CRF01\_AE plus four reference sequences of HIV-1 subtype B as outgroup. For visual clarity, only HIV-1 CRF01\_AE strains are shown. Bootstrap value  $\geq 90\%$  is shown at the node with black circle. Sequence names include accession number, geographic location, and year of sampling. The scale bar shows nucleotide substitutions per site. Shading indicates the delineation of 10 CRF01\_AE clusters. TH = Thailand HIV-1 CRF01\_AE; PAN = Pandemic HIV-1 CRF01\_AE.

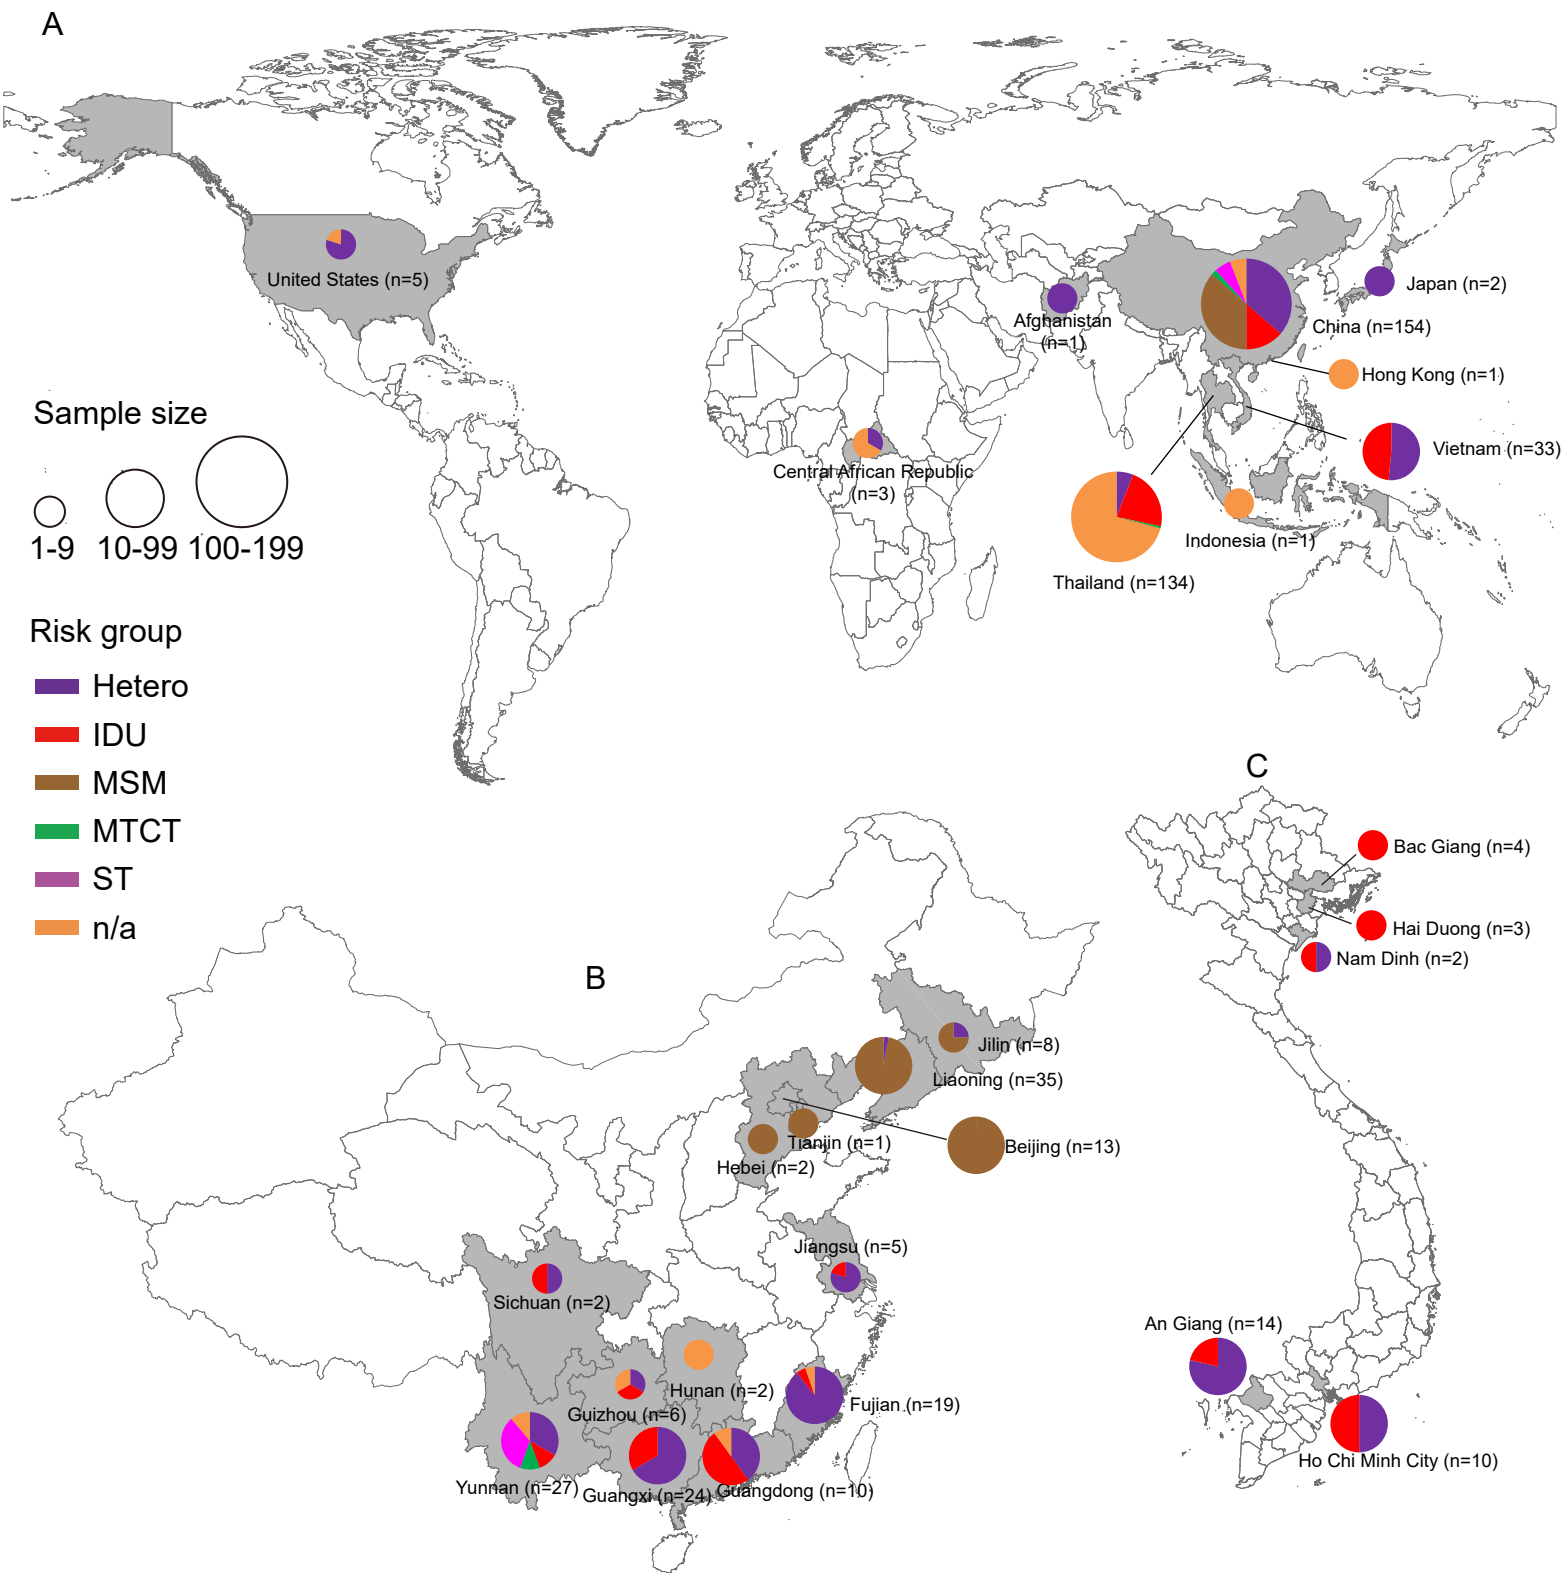

**Supplementary Figure S3. Geographic distribution of risk groups of HIV-1 CRF01\_AE identified in the present study.** Geographic distribution of risk groups of HIV-1 CRF01\_AE is shown at the (A) country level, and at the provincial level for (B) China and (C) Vietnam. Each risk group of HIV-1 CRF01\_AE identified in this study is color-coded, as shown on the left. The figure was created using Adobe Illustrator CS5 version 15.0.0 software, based on the maps obtained from Craft MAP website (<http://www.craftmap.box-i.net/>).

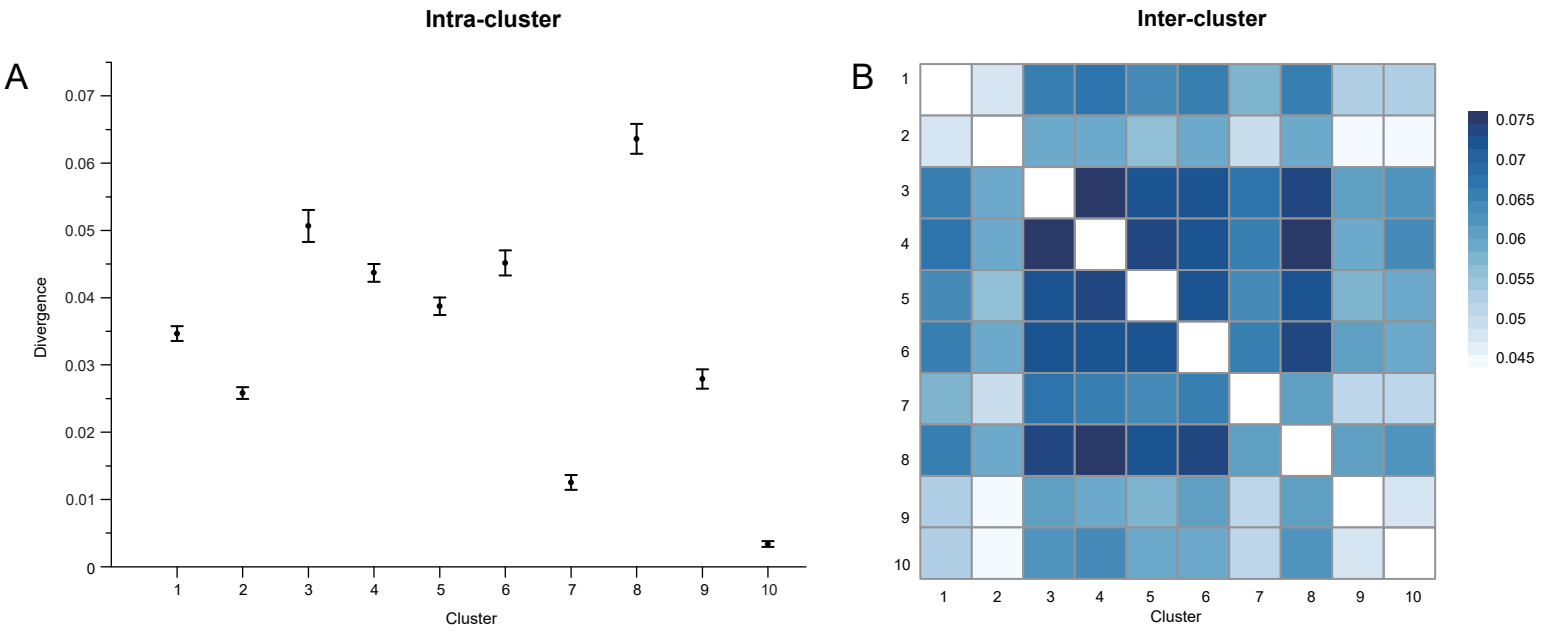

**Supplementary Figure S4. Average pairwise genetic distances within and between HIV-1 CRF01\_AE clusters.** The number of base substitutions per site, averaged across all sequence pairs within (A) and between (B) HIV-1 CRF01\_AE clusters.

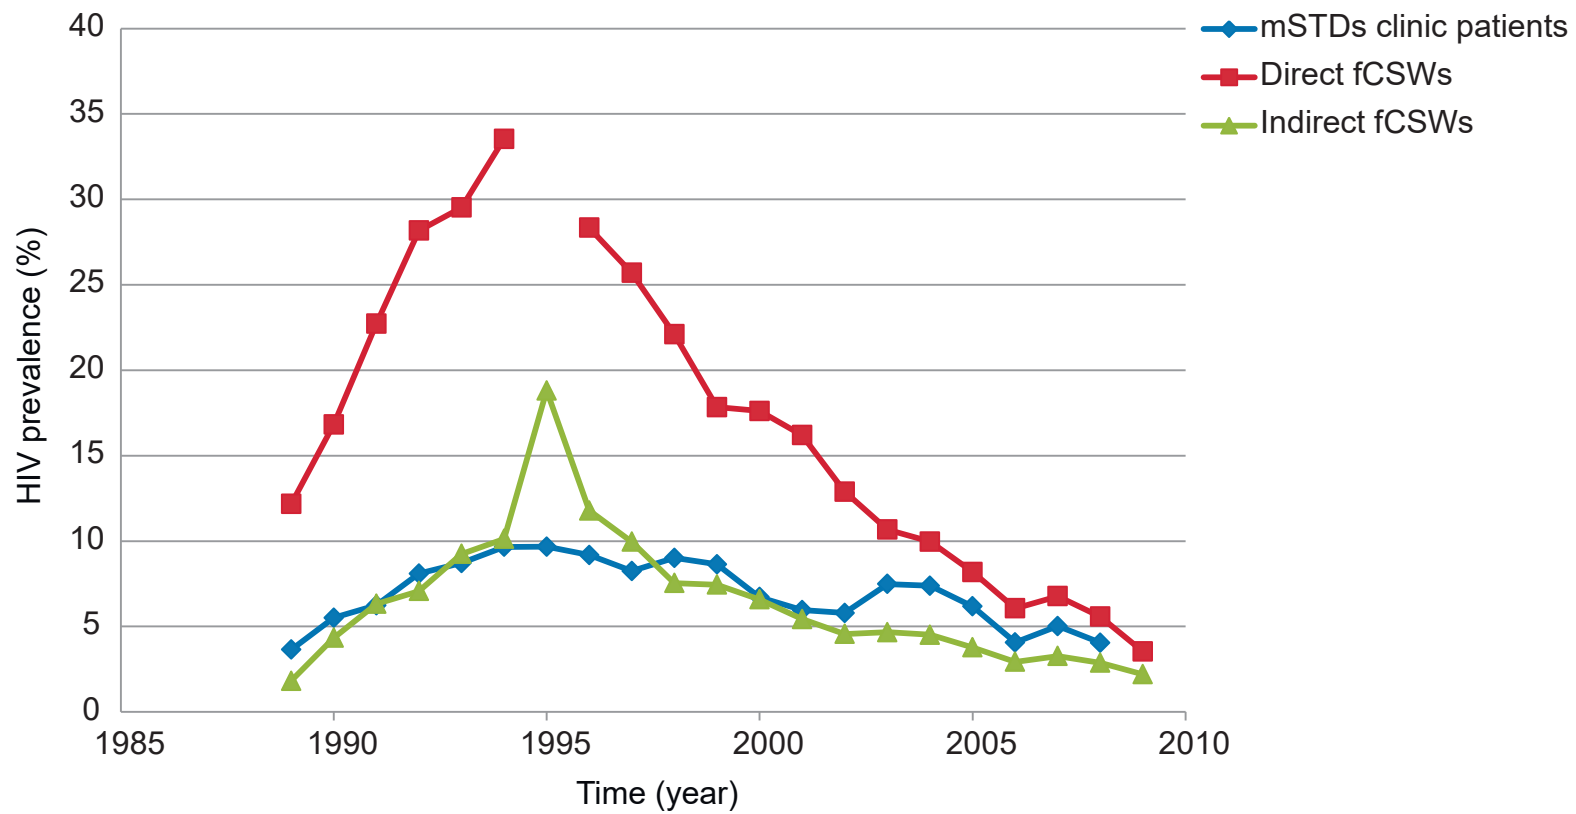

**Supplementary Figure S5. HIV prevalence among female commercial sex workers (fCSWs) and male sexually transmitted disease patients (mSTDs) in Thailand by year.** HIV prevalence is given for brothel-based female commercial sex workers (direct fCSWs) and non-brothel-based female commercial sex workers (indirect fCSWs). Data were unavailable for direct fCSWs in Thailand in 1995. Data were obtained from the Bureau of Epidemiology, Thailand.

**Supplementary Table S1. HIV-1 CRF01\_AE sequences analysed in the present study.**

| <b>Acc. No.</b> | <b>Sequence name</b> | <b>Geographic source</b> | <b>Sampling year</b> | <b>Risk factor<sup>a</sup></b> | <b>CRF01_AE cluster</b> | <b>Data source</b> |
|-----------------|----------------------|--------------------------|----------------------|--------------------------------|-------------------------|--------------------|
| GQ845124        | 05GX034              | Guangxi, China           | 2005                 | Hetero                         | CRF01_1AE               | database           |
| JX112835        | GX070143             | Guangxi, China           | 2007                 | Hetero                         | CRF01_1AE               | database           |
| JX112832        | GX070043             | Guangxi, China           | 2007                 | Hetero                         | CRF01_1AE               | database           |
| JX112834        | GX070076             | Guangxi, China           | 2007                 | Hetero                         | CRF01_1AE               | database           |
| GU564229        | 05GX162              | Guangxi, China           | 2005                 | Hetero                         | CRF01_1AE               | database           |
| JX112836        | GX070145             | Guangxi, China           | 2007                 | Hetero                         | CRF01_1AE               | database           |
| GU564224        | 05GX013              | Guangxi, China           | 2005                 | IDU                            | CRF01_1AE               | database           |
| GU564225        | 05GX014              | Guangxi, China           | 2005                 | Hetero                         | CRF01_1AE               | database           |
| JX112837        | GX070149             | Guangxi, China           | 2007                 | IDU                            | CRF01_1AE               | database           |
| JX112838        | GX070154             | Guangxi, China           | 2007                 | IDU                            | CRF01_1AE               | database           |
| JX112839        | GX070167             | Guangxi, China           | 2007                 | IDU                            | CRF01_1AE               | database           |
| JX112829        | GX070003             | Guangxi, China           | 2007                 | Hetero                         | CRF01_1AE               | database           |
| GQ845126        | 05GX128              | Guangxi, China           | 2005                 | Hetero                         | CRF01_1AE               | database           |
| GU564227        | 05GX142              | Guangxi, China           | 2005                 | Hetero                         | CRF01_1AE               | database           |
| GU564222        | 05GX002              | Guangxi, China           | 2005                 | Hetero                         | CRF01_1AE               | database           |
| GU564228        | 05GX156              | Guangxi, China           | 2005                 | IDU                            | CRF01_1AE               | database           |
| GU564223        | 05GX012              | Guangxi, China           | 2005                 | Hetero                         | CRF01_1AE               | database           |
| JX112831        | GX070006             | Guangxi, China           | 2007                 | IDU                            | CRF01_1AE               | database           |
| JX112819        | GD070010             | Guangdong, China         | 2007                 | Hetero                         | CRF01_1AE               | database           |
| JX112825        | GD070096             | Guangdong, China         | 2007                 | IDU                            | CRF01_1AE               | database           |
| JX112826        | GD070118             | Guangdong, China         | 2007                 | IDU                            | CRF01_1AE               | database           |
| JX112828        | GD070176             | Guangdong, China         | 2007                 | IDU                            | CRF01_1AE               | database           |
| JX112822        | GD070083             | Guangdong, China         | 2007                 | Hetero                         | CRF01_1AE               | database           |
| JX112823        | GD070090             | Guangdong, China         | 2007                 | IDU                            | CRF01_1AE               | database           |
| JX112824        | GD070092             | Guangdong, China         | 2007                 | IDU                            | CRF01_1AE               | database           |
| JX112809        | FJ070010             | Fujian, China            | 2007                 | Hetero                         | CRF01_1AE               | database           |
| JX112817        | FJ070040             | Fujian, China            | 2007                 | Hetero                         | CRF01_1AE               | database           |
| JX112814        | FJ070035             | Fujian, China            | 2007                 | Hetero                         | CRF01_1AE               | database           |
| JX112815        | FJ070037             | Fujian, China            | 2007                 | Hetero                         | CRF01_1AE               | database           |
| JX112811        | FJ070017             | Fujian, China            | 2007                 | Hetero                         | CRF01_1AE               | database           |
| JX112845        | GZ070127             | Guizhou, China           | 2007                 | Hetero                         | CRF01_1AE               | database           |
| JX112840        | GZ070004             | Guizhou, China           | 2007                 | IDU                            | CRF01_1AE               | database           |
| JX112841        | GZ070015             | Guizhou, China           | 2007                 | n/a                            | CRF01_1AE               | database           |
| JX112842        | GZ070016             | Guizhou, China           | 2007                 | IDU                            | CRF01_1AE               | database           |
| JX112851        | JS071001             | Jiangsu, China           | 2007                 | Hetero                         | CRF01_1AE               | database           |
| JX112852        | JS071004             | Jiangsu, China           | 2007                 | Hetero                         | CRF01_1AE               | database           |
| JX112857        | SC070062             | Sichuan, China           | 2007                 | IDU                            | CRF01_1AE               | database           |
| JX112858        | SC070064             | Sichuan, China           | 2007                 | Hetero                         | CRF01_1AE               | database           |
| JX112869        | ZK052                | Hunan, China             | 2010                 | n/a                            | CRF01_1AE               | database           |
| KP860670        | JL110056             | Jilin, China             | 2011                 | Hetero                         | CRF01_1AE               | this study         |
| AY008714        | 97CNGX2F             | Guangxi, China           | 1997                 | IDU                            | CRF01_2AE               | database           |
| AY008718        | 97CNGX11F            | Guangxi, China           | 1997                 | IDU                            | CRF01_2AE               | database           |
| GU564221        | 05GX001              | Guangxi, China           | 2005                 | Hetero                         | CRF01_2AE               | database           |
| GU564230        | 06GX239              | Guangxi, China           | 2006                 | Hetero                         | CRF01_2AE               | database           |
| JX112830        | GX070005             | Guangxi, China           | 2007                 | Hetero                         | CRF01_2AE               | database           |
| JX112833        | GX070044             | Guangxi, China           | 2007                 | Hetero                         | CRF01_2AE               | database           |
| JX112816        | FJ070039             | Fujian, China            | 2007                 | Hetero                         | CRF01_2AE               | database           |
| JX112810        | FJ070013             | Fujian, China            | 2007                 | Hetero                         | CRF01_2AE               | database           |
| JX112850        | JS070901             | Jiangsu, China           | 2007                 | Hetero                         | CRF01_2AE               | database           |
| FJ185238        | 97VNHCM302           | Hochiminh, Vietnam       | 1997                 | IDU                            | CRF01_2AE               | database           |
| FJ185239        | 97VNHCM303           | Hochiminh, Vietnam       | 1997                 | IDU                            | CRF01_2AE               | database           |



|          |            |                    |      |        |           |          |
|----------|------------|--------------------|------|--------|-----------|----------|
| FJ185259 | 97VNHCM306 | Hochiminh, Vietnam | 1997 | IDU    | CRF01_2AE | database |
| FJ185260 | 97VNHCM309 | Hochiminh, Vietnam | 1997 | IDU    | CRF01_2AE | database |
| FJ185240 | 97VNHCM310 | Hochiminh, Vietnam | 1997 | IDU    | CRF01_2AE | database |
| FJ185228 | 98VNBG4    | Bacgiang, Vietnam  | 1998 | IDU    | CRF01_2AE | database |
| FJ185229 | 98VNBG5    | Bacgiang, Vietnam  | 1998 | IDU    | CRF01_2AE | database |
| FJ185230 | 98VNBG6    | Bacgiang, Vietnam  | 1998 | IDU    | CRF01_2AE | database |
| FJ185231 | 98VNBG7    | Bacgiang, Vietnam  | 1998 | IDU    | CRF01_2AE | database |
| FJ185245 | 97VNAG201  | Angiang, Vietnam   | 1997 | IDU    | CRF01_2AE | database |
| FJ185256 | 97VNAG220  | Angiang, Vietnam   | 1997 | IDU    | CRF01_2AE | database |
| FJ185257 | 97VNAG221  | Angiang, Vietnam   | 1997 | IDU    | CRF01_2AE | database |
| FJ185232 | 98VNHD9    | Haiduong, Vietnam  | 1998 | IDU    | CRF01_2AE | database |
| FJ185233 | 98VNHD10   | Haiduong, Vietnam  | 1998 | IDU    | CRF01_2AE | database |
| FJ185234 | 98VNHD11   | Haiduong, Vietnam  | 1998 | IDU    | CRF01_2AE | database |
| FJ185235 | 98VNND15   | Namdinh, Vietnam   | 1998 | Hetero | CRF01_2AE | database |
| FJ185236 | 98VNND17   | Namdinh, Vietnam   | 1998 | IDU    | CRF01_2AE | database |
| EF036528 | FJ052      | Fujian, China      | 2005 | IDU    | CRF01_3AE | database |
| JX112827 | GD070120   | Guangdong, China   | 2007 | n/a    | CRF01_3AE | database |
| JX112843 | GZ070123   | Guizhou, China     | 2007 | Hetero | CRF01_3AE | database |
| JX112796 | CYM059     | Beijing, China     | 2010 | MSM    | CRF01_4AE | database |
| JX112797 | CYM075     | Beijing, China     | 2010 | MSM    | CRF01_4AE | database |
| JX112799 | CYM124     | Beijing, China     | 2010 | MSM    | CRF01_4AE | database |
| JX112800 | CYM136     | Beijing, China     | 2010 | MSM    | CRF01_4AE | database |
| JX112801 | CYM138     | Beijing, China     | 2010 | MSM    | CRF01_4AE | database |
| JX112802 | CYM139     | Beijing, China     | 2010 | MSM    | CRF01_4AE | database |
| JX112806 | CYM149     | Beijing, China     | 2010 | MSM    | CRF01_4AE | database |
| JX112807 | CYM152     | Beijing, China     | 2010 | MSM    | CRF01_4AE | database |
| JX112808 | CYM154     | Beijing, China     | 2010 | MSM    | CRF01_4AE | database |
| JX112803 | CYM140     | Beijing, China     | 2010 | MSM    | CRF01_4AE | database |
| JX112805 | CYM147     | Beijing, China     | 2010 | MSM    | CRF01_4AE | database |
| JX960611 | 10LNA571   | Liaoning, China    | 2010 | MSM    | CRF01_4AE | database |
| JX960609 | 10LNA124   | Liaoning, China    | 2010 | MSM    | CRF01_4AE | database |
| JX960610 | 10LNA819   | Liaoning, China    | 2010 | MSM    | CRF01_4AE | database |
| JX960604 | 09LNA008   | Liaoning, China    | 2009 | MSM    | CRF01_4AE | database |
| JX960605 | 09LNA011   | Liaoning, China    | 2009 | MSM    | CRF01_4AE | database |
| JX960606 | 08LNA003   | Liaoning, China    | 2008 | MSM    | CRF01_4AE | database |
| JX960607 | 09LNA340   | Liaoning, China    | 2009 | MSM    | CRF01_4AE | database |
| JX960608 | 10LNA103   | Liaoning, China    | 2010 | MSM    | CRF01_4AE | database |
| FJ441290 | 07JSWX045  | Jiangsu, China     | 2007 | IDU    | CRF01_4AE | database |
| JX112853 | JS071101   | Jiangsu, China     | 2007 | Hetero | CRF01_4AE | database |
| JX112870 | ZK056      | Hunan, China       | 2010 | n/a    | CRF01_4AE | database |
| HQ215555 | 1109       | Hebei, China       | 2009 | MSM    | CRF01_4AE | database |
| JX112859 | TJ070003   | Tianjin, China     | 2007 | MSM    | CRF01_4AE | database |
| KF835542 | 07CNYN364  | Yunnan, China      | 2007 | ST     | CRF01_4AE | database |
| JX960612 | 08LNA002   | Liaoning, China    | 2008 | MSM    | CRF01_5AE | database |
| JX960614 | 09LNA230   | Liaoning, China    | 2009 | MSM    | CRF01_5AE | database |
| JX960613 | 09LNA020   | Liaoning, China    | 2009 | MSM    | CRF01_5AE | database |
| JX960615 | 09LNA040   | Liaoning, China    | 2009 | MSM    | CRF01_5AE | database |
| JX960616 | 10LNA821   | Liaoning, China    | 2010 | MSM    | CRF01_5AE | database |
| JX960617 | 08LNA004   | Liaoning, China    | 2008 | MSM    | CRF01_5AE | database |
| JX960618 | 09LNA041   | Liaoning, China    | 2009 | MSM    | CRF01_5AE | database |
| JX960619 | 10LNA294   | Liaoning, China    | 2010 | MSM    | CRF01_5AE | database |
| JX960620 | 10LNA918   | Liaoning, China    | 2010 | MSM    | CRF01_5AE | database |
| JX960621 | 09LNA425   | Liaoning, China    | 2009 | MSM    | CRF01_5AE | database |
| JX960622 | 10LNA264   | Liaoning, China    | 2010 | MSM    | CRF01_5AE | database |
| JX960623 | 09LNA013   | Liaoning, China    | 2009 | MSM    | CRF01_5AE | database |
| JX960624 | 10LNA669   | Liaoning, China    | 2010 | MSM    | CRF01_5AE | database |

|          |             |                  |      |        |            |            |
|----------|-------------|------------------|------|--------|------------|------------|
| JX960625 | 09LNA527    | Liaoning, China  | 2009 | MSM    | CRF01_5AE  | database   |
| JX960626 | 10LNA105    | Liaoning, China  | 2009 | MSM    | CRF01_5AE  | database   |
| JX960627 | 09LNA007    | Liaoning, China  | 2009 | MSM    | CRF01_5AE  | database   |
| JX960628 | 09LNA353    | Liaoning, China  | 2009 | MSM    | CRF01_5AE  | database   |
| JX960629 | 10LNA016    | Liaoning, China  | 2009 | MSM    | CRF01_5AE  | database   |
| JX960630 | 09LNA005    | Liaoning, China  | 2009 | MSM    | CRF01_5AE  | database   |
| JX960631 | 09LNA136    | Liaoning, China  | 2009 | MSM    | CRF01_5AE  | database   |
| JX960632 | 10LNA976    | Liaoning, China  | 2010 | MSM    | CRF01_5AE  | database   |
| JX960633 | 10LNA057    | Liaoning, China  | 2010 | MSM    | CRF01_5AE  | database   |
| JX960634 | 09LNA025    | Liaoning, China  | 2009 | MSM    | CRF01_5AE  | database   |
| JX112854 | LN070008    | Liaoning, China  | 2007 | MSM    | CRF01_5AE  | database   |
| JX112855 | LN070010    | Liaoning, China  | 2007 | MSM    | CRF01_5AE  | database   |
| JX112856 | LN070013    | Liaoning, China  | 2007 | Hetero | CRF01_5AE  | database   |
| JX112846 | JL100005    | Jilin, China     | 2010 | Hetero | CRF01_5AE  | database   |
| JX112847 | JL100007    | Jilin, China     | 2010 | MSM    | CRF01_5AE  | database   |
| JX112848 | JL100014    | Jilin, China     | 2010 | MSM    | CRF01_5AE  | database   |
| JX112849 | JL100020    | Jilin, China     | 2010 | MSM    | CRF01_5AE  | database   |
| KP860667 | JL100034    | Jilin, China     | 2010 | MSM    | CRF01_5AE  | this study |
| KP860668 | JL100038    | Jilin, China     | 2010 | MSM    | CRF01_5AE  | this study |
| KP860669 | JL110010    | Jilin, China     | 2011 | MSM    | CRF01_5AE  | this study |
| JX112798 | CYM105      | Beijing, China   | 2010 | MSM    | CRF01_5AE  | database   |
| JX112804 | CMY143      | Beijing, China   | 2010 | MSM    | CRF01_5AE  | database   |
| HQ215553 | 1119        | Hebei, China     | 2009 | MSM    | CRF01_5AE  | database   |
| JX447081 | AA033a_wg6a | Thailand         | 2005 | n/a    | CRF01_5AE  | database   |
| EF036527 | FJ055       | Fujian, China    | 2005 | Hetero | CRF01_6AE  | database   |
| EF036530 | FJ057       | Fujian, China    | 2005 | Hetero | CRF01_6AE  | database   |
| JX112812 | FJ070018    | Fujian, China    | 2007 | Hetero | CRF01_6AE  | database   |
| JX112818 | FJ070043    | Fujian, China    | 2007 | Hetero | CRF01_6AE  | database   |
| JX112860 | YN0203      | Yunnan, China    | 2002 | Hetero | CRF01_7AE  | database   |
| JX112862 | YN0225      | Yunnan, China    | 2002 | Hetero | CRF01_7AE  | database   |
| JX112865 | YN0235      | Yunnan, China    | 2002 | Hetero | CRF01_7AE  | database   |
| KF835538 | 07CNYN359   | Yunnan, China    | 2007 | Hetero | CRF01_8AE  | database   |
| KF835516 | 07CNYN329   | Yunnan, China    | 2007 | n/a    | CRF01_8AE  | database   |
| KF835536 | 07CNYN357   | Yunnan, China    | 2007 | ST     | CRF01_8AE  | database   |
| JX112820 | GD070058    | Guangdong, China | 2007 | Hetero | CRF01_8AE  | database   |
| JX112821 | GD070059    | Guangdong, China | 2007 | Hetero | CRF01_8AE  | database   |
| AY358049 | OUR258I     | Thailand         | 1999 | IDU    | CRF01_9AE  | database   |
| AY358061 | OUR746I     | Thailand         | 2000 | IDU    | CRF01_9AE  | database   |
| AY358051 | OUR422I     | Thailand         | 1999 | IDU    | CRF01_9AE  | database   |
| AY358039 | OUR199I     | Thailand         | 1999 | IDU    | CRF01_10AE | database   |
| AY358047 | OUR202I     | Thailand         | 1999 | IDU    | CRF01_10AE | database   |
| AY358048 | OUR203I     | Thailand         | 1999 | IDU    | CRF01_10AE | database   |
| AY358066 | OUR200I     | Thailand         | 2000 | IDU    | CRF01_10AE | database   |
| AY358046 | OUR201I     | Thailand         | 2000 | IDU    | CRF01_10AE | database   |
| JX112867 | YN09P0011   | Yunnan, China    | 2009 | Hetero |            | database   |
| JX112868 | YN09P0015   | Yunnan, China    | 2009 | Hetero |            | database   |
| JX112861 | YN0221      | Yunnan, China    | 2002 | IDU    |            | database   |
| JX112863 | YN0229      | Yunnan, China    | 2002 | IDU    |            | database   |
| JX112864 | YN0232      | Yunnan, China    | 2002 | Hetero |            | database   |
| JX112866 | YN0236      | Yunnan, China    | 2002 | Hetero |            | database   |
| KF835499 | 07CNYN312   | Yunnan, China    | 2007 | MTCT   |            | database   |
| KF835502 | 07CNYN315   | Yunnan, China    | 2007 | ST     |            | database   |
| KF835503 | 07CNYN316   | Yunnan, China    | 2007 | ST     |            | database   |
| KF835504 | 07CNYN317   | Yunnan, China    | 2007 | n/a    |            | database   |
| KF835505 | 07CNYN318   | Yunnan, China    | 2007 | MTCT   |            | database   |
| KF835513 | 07CNYN326   | Yunnan, China    | 2007 | Hetero |            | database   |

|          |            |                    |      |        |          |
|----------|------------|--------------------|------|--------|----------|
| KF835514 | 07CNYN327  | Yunnan, China      | 2007 | IDU    | database |
| KF835518 | 07CNYN332  | Yunnan, China      | 2007 | ST     | database |
| KF835519 | 07CNYN333  | Yunnan, China      | 2007 | ST     | database |
| KF835523 | 07CNYN337  | Yunnan, China      | 2007 | MTCT   | database |
| KF835527 | 07CNYN342  | Yunnan, China      | 2007 | ST     | database |
| KF835528 | 07CNYN343  | Yunnan, China      | 2007 | n/a    | database |
| KF835533 | 07CNYN354  | Yunnan, China      | 2007 | ST     | database |
| KF835543 | 07CNYN366  | Yunnan, China      | 2007 | ST     | database |
| DQ859179 | FJ053      | Fujian, China      | 2005 | Hetero | database |
| DQ859178 | FJ051      | Fujian, China      | 2005 | Hetero | database |
| DQ859180 | FJ054      | Fujian, China      | 2006 | Hetero | database |
| EF036532 | FJ063      | Fujian, China      | 2006 | Hetero | database |
| EF036534 | FJ065      | Fujian, China      | 2005 | Hetero | database |
| EF036535 | FJ066      | Fujian, China      | 2005 | Hetero | database |
| JX112813 | FJ070033   | Fujian, China      | 2007 | n/a    | database |
| JX960603 | 09LNA379   | Liaoning, China    | 2009 | MSM    | database |
| JX112844 | GZ070126   | Guizhou, China     | 2007 | n/a    | database |
| DQ234790 | HK001      | Hong Kong          | 2004 | n/a    | database |
| FJ185246 | 97VNAG202  | Angiang, Vietnam   | 1997 | Hetero | database |
| FJ185252 | 97VNAG212  | Angiang, Vietnam   | 1997 | Hetero | database |
| FJ185253 | 97VNAG214  | Angiang, Vietnam   | 1997 | Hetero | database |
| FJ185254 | 97VNAG216  | Angiang, Vietnam   | 1997 | Hetero | database |
| FJ185255 | 97VNAG218  | Angiang, Vietnam   | 1997 | Hetero | database |
| FJ185258 | 97VNAG223  | Angiang, Vietnam   | 1997 | Hetero | database |
| FJ185249 | 97VNAG207  | Angiang, Vietnam   | 1997 | Hetero | database |
| FJ185250 | 97VNAG208  | Angiang, Vietnam   | 1997 | Hetero | database |
| FJ185247 | 97VNAG204  | Angiang, Vietnam   | 1997 | Hetero | database |
| FJ185248 | 97VNAG206  | Angiang, Vietnam   | 1997 | Hetero | database |
| FJ185251 | 97VNAG210  | Angiang, Vietnam   | 1997 | Hetero | database |
| FJ185237 | 97VNHCM301 | Hochiminh, Vietnam | 1997 | Hetero | database |
| FJ185241 | 97VNHCM314 | Hochiminh, Vietnam | 1997 | Hetero | database |
| FJ185242 | 97VNHCM319 | Hochiminh, Vietnam | 1997 | Hetero | database |
| FJ185243 | 97VNHCM343 | Hochiminh, Vietnam | 1997 | Hetero | database |
| FJ185244 | 97VNHCM345 | Hochiminh, Vietnam | 1997 | Hetero | database |
| AY358052 | OUR595I    | Thailand           | 2000 | IDU    | database |
| AF164485 | 93TH9021   | Thailand           | 1993 | n/a    | database |
| JN248318 | 04TH107542 | Thailand           | 2004 | n/a    | database |
| JN248338 | 05TH127331 | Thailand           | 2005 | n/a    | database |
| AY945718 | 99TH_C2405 | Thailand           | 1999 | n/a    | database |
| AB032740 | 95TNIH022  | Thailand           | 1995 | Hetero | database |
| AB032741 | 95TNIH047  | Thailand           | 1995 | Hetero | database |
| AB220944 | 93TH051    | Thailand           | 1993 | n/a    | database |
| AB220945 | 93TH054    | Thailand           | 1993 | n/a    | database |
| AB220946 | 93TH060    | Thailand           | 1993 | n/a    | database |
| AB220947 | 93TH062    | Thailand           | 1993 | n/a    | database |
| AB220948 | 93TH065    | Thailand           | 1993 | IDU    | database |
| AB253424 | 93TH057    | Thailand           | 1993 | IDU    | database |
| AF259954 | CM235      | Thailand           | 1990 | Hetero | database |
| AY125894 | 97TH6_107  | Thailand           | 1997 | n/a    | database |
| AY358036 | OUR786I    | Thailand           | 2001 | IDU    | database |
| AY358037 | OUR737I    | Thailand           | 2002 | IDU    | database |
| AY358038 | OUR674I    | Thailand           | 2001 | IDU    | database |
| AY358040 | OUR609I    | Thailand           | 2001 | IDU    | database |
| AY358041 | OUR642I    | Thailand           | 2001 | IDU    | database |
| AY358042 | OUR044I    | Thailand           | 1999 | IDU    | database |
| AY358043 | OUR066I    | Thailand           | 1999 | IDU    | database |

|          |             |          |      |        |          |
|----------|-------------|----------|------|--------|----------|
| AY358044 | OUR098I     | Thailand | 1999 | IDU    | database |
| AY358045 | OUR164I     | Thailand | 1999 | IDU    | database |
| AY358050 | OUR414I     | Thailand | 2001 | Hetero | database |
| AY358056 | OUR647I     | Thailand | 2001 | IDU    | database |
| AY358057 | OUR661I     | Thailand | 2000 | IDU    | database |
| AY358059 | OUR702I     | Thailand | 2001 | IDU    | database |
| AY358060 | OUR724I     | Thailand | 2000 | IDU    | database |
| AY358062 | OUR769I     | Thailand | 2002 | IDU    | database |
| AY358063 | OUR810I     | Thailand | 2000 | IDU    | database |
| AY358064 | OUR830I     | Thailand | 2001 | IDU    | database |
| AY358065 | OUR008I     | Thailand | 1999 | IDU    | database |
| AY358067 | OUR721I     | Thailand | 2000 | IDU    | database |
| AY358068 | OUR788I     | Thailand | 2001 | IDU    | database |
| AY713419 | 97TH_NP1695 | Thailand | 1997 | n/a    | database |
| AY713420 | 97TH_NP1525 | Thailand | 1997 | n/a    | database |
| AY713421 | 96TH_NI1046 | Thailand | 1996 | n/a    | database |
| AY713422 | 98TH_NP1251 | Thailand | 1998 | n/a    | database |
| AY713423 | 99TH_NI1052 | Thailand | 1999 | n/a    | database |
| AY713424 | 96TH_M02138 | Thailand | 1996 | n/a    | database |
| AY713425 | 90TH_CM244  | Thailand | 1990 | n/a    | database |
| AY945712 | 99TH_C1080  | Thailand | 1999 | Hetero | database |
| AY945713 | 01TH_C1436  | Thailand | 2001 | n/a    | database |
| AY945716 | 00TH_C2101  | Thailand | 2000 | Hetero | database |
| AY945717 | 00TH_C2257  | Thailand | 2000 | n/a    | database |
| AY945719 | 01TH_C2570  | Thailand | 2001 | n/a    | database |
| AY945720 | 01TH_C3256  | Thailand | 2001 | n/a    | database |
| AY945721 | 00TH_C3347  | Thailand | 2000 | n/a    | database |
| AY945722 | 00TH_C4118  | Thailand | 2000 | n/a    | database |
| AY945724 | 00TH_C4151  | Thailand | 2000 | n/a    | database |
| AY945725 | 00TH_C4382  | Thailand | 2000 | n/a    | database |
| AY945726 | 99TH_C4460  | Thailand | 1999 | n/a    | database |
| AY945727 | 99TH_R1149  | Thailand | 1999 | Hetero | database |
| AY945728 | 98TH_R1166  | Thailand | 1998 | Hetero | database |
| AY945730 | 01TH_R2184  | Thailand | 2001 | Hetero | database |
| AY945731 | 99TH_R3006  | Thailand | 1999 | Hetero | database |
| AY945732 | 99TH_R3265  | Thailand | 1999 | Hetero | database |
| DQ314731 | BKD         | Thailand | 2004 | MTCT   | database |
| DQ314732 | BKM         | Thailand | 2004 | n/a    | database |
| DQ354117 | M114        | Thailand | 1996 | Hetero | database |
| DQ789392 | C1705       | Thailand | 2000 | n/a    | database |
| JN248324 | 04TH328531  | Thailand | 2004 | n/a    | database |
| JN248327 | 04TH427990  | Thailand | 2004 | n/a    | database |
| JN248328 | 04TH505841  | Thailand | 2004 | n/a    | database |
| JN248330 | 04TH613543  | Thailand | 2004 | n/a    | database |
| JN248334 | 04TH807015  | Thailand | 2004 | n/a    | database |
| JN248336 | 04TH817196  | Thailand | 2004 | n/a    | database |
| JN248339 | 05TH130087  | Thailand | 2005 | n/a    | database |
| JN248341 | 05TH327568  | Thailand | 2005 | n/a    | database |
| JN248342 | 05TH342968  | Thailand | 2005 | n/a    | database |
| JN248355 | 05TH741452  | Thailand | 2005 | n/a    | database |
| JN248356 | 05TH841749  | Thailand | 2005 | n/a    | database |
| JN860761 | MERLBDTRC2  | Thailand | 2007 | n/a    | database |
| JN860763 | MERLBDTRC4  | Thailand | 2007 | n/a    | database |
| JN860764 | MERLBDTRC5  | Thailand | 2007 | n/a    | database |
| JN860766 | MERLBDTRC7  | Thailand | 2007 | n/a    | database |
| JN860767 | MERLBDTRC8  | Thailand | 2007 | n/a    | database |

|          |                |               |      |        |          |
|----------|----------------|---------------|------|--------|----------|
| JN860768 | MERLBDTRC9     | Thailand      | 2008 | n/a    | database |
| JX446666 | AA002a_WG1     | Thailand      | 2006 | n/a    | database |
| JX446712 | AA004a_wg4a    | Thailand      | 2005 | n/a    | database |
| JX446736 | AA006a02       | Thailand      | 2006 | n/a    | database |
| JX446756 | AA007a_WG10    | Thailand      | 2008 | n/a    | database |
| JX446855 | AA014a01       | Thailand      | 2006 | n/a    | database |
| JX446877 | AA015a_WG4     | Thailand      | 2007 | n/a    | database |
| JX446899 | AA017a_wg1     | Thailand      | 2006 | n/a    | database |
| JX446918 | AA019a_WG11    | Thailand      | 2007 | n/a    | database |
| JX446994 | AA024a04       | Thailand      | 2007 | n/a    | database |
| JX447025 | AA027a_wg1a    | Thailand      | 2004 | n/a    | database |
| JX447028 | AA028a_wg3     | Thailand      | 2007 | n/a    | database |
| JX447057 | AA030a04       | Thailand      | 2007 | n/a    | database |
| JX447064 | AA031a02       | Thailand      | 2007 | n/a    | database |
| JX447074 | AA032a04       | Thailand      | 2008 | n/a    | database |
| JX447089 | AA034a_wg2     | Thailand      | 2006 | n/a    | database |
| JX447127 | AA037a_WG6     | Thailand      | 2008 | n/a    | database |
| JX447132 | AA038a_WG3     | Thailand      | 2006 | n/a    | database |
| JX447268 | AA049a_WG13    | Thailand      | 2005 | n/a    | database |
| JX447283 | AA050a_WG7     | Thailand      | 2007 | n/a    | database |
| JX447303 | AA052a08       | Thailand      | 2008 | n/a    | database |
| JX447308 | AA054a06       | Thailand      | 2008 | n/a    | database |
| JX447312 | AA055a_WG4     | Thailand      | 2006 | n/a    | database |
| JX447316 | AA056a_WG5     | Thailand      | 2006 | n/a    | database |
| JX447358 | AA059a_WG9     | Thailand      | 2006 | n/a    | database |
| JX447359 | AA060a_WG1     | Thailand      | 2008 | n/a    | database |
| JX447409 | AA063a_WG37    | Thailand      | 2006 | n/a    | database |
| JX447413 | AA064a_WG2     | Thailand      | 2005 | n/a    | database |
| JX447458 | AA067a_WG12    | Thailand      | 2008 | n/a    | database |
| JX447465 | AA068a_14      | Thailand      | 2006 | n/a    | database |
| JX447503 | AA072a03       | Thailand      | 2007 | n/a    | database |
| JX447542 | AA075a_WG7     | Thailand      | 2004 | n/a    | database |
| JX447592 | AA079a_WG4     | Thailand      | 2005 | n/a    | database |
| JX447619 | AA081a14       | Thailand      | 2005 | n/a    | database |
| JX447646 | AA082a_WG9     | Thailand      | 2006 | n/a    | database |
| JX447682 | AA085a_wg2     | Thailand      | 2006 | n/a    | database |
| JX447712 | AA088a_wg14    | Thailand      | 2006 | n/a    | database |
| JX447721 | AA089a05       | Thailand      | 2007 | n/a    | database |
| JX447727 | AA090a_WG11    | Thailand      | 2009 | n/a    | database |
| JX447891 | AA099a_WG9     | Thailand      | 2006 | n/a    | database |
| JX447936 | AA101a_WG1     | Thailand      | 2005 | n/a    | database |
| JX448022 | AA107a_wg4     | Thailand      | 2005 | n/a    | database |
| JX448028 | AA108a_WG6     | Thailand      | 2008 | n/a    | database |
| JX448059 | AA111a_WG11    | Thailand      | 2009 | n/a    | database |
| U51189   | 93TH253        | Thailand      | 1993 | Hetero | database |
| AY713426 | 96TH_NI1149    | Thailand      | 1996 | n/a    | database |
| U54771   | CM240          | Thailand      | 1990 | Hetero | database |
| AY444803 | 98US_MSC1120   | United States | 1998 | Hetero | database |
| AY444806 | 98US_MSC3012   | United States | 1998 | Hetero | database |
| JX863920 | 306163_FL      | United States | 2005 | n/a    | database |
| AY444804 | 00US_MSC1164   | United States | 2000 | Hetero | database |
| AY444805 | 98US_MSC2008   | United States | 1998 | Hetero | database |
| AB052995 | 93JP_NH1       | Japan         | 1993 | Hetero | database |
| AB070352 | NH25_93JPNH25T | Japan         | 1993 | Hetero | database |
| AB485652 | ID17           | Indonesia     | 1993 | n/a    | database |
| GQ477441 | 569M           | Afghanistan   | 2007 | Hetero | database |

|          |                    |                  |      |        |          |
|----------|--------------------|------------------|------|--------|----------|
| AF197340 | 90CF11697          | <sup>b</sup> CAR | 1990 | n/a    | database |
| AF197341 | 90CF4071           | <sup>b</sup> CAR | 1990 | n/a    | database |
| U51188   | 90CR402_CAR_E_4002 | <sup>b</sup> CAR | 1990 | Hetero | database |

---

<sup>a</sup>Risk group: Hetero, heterosexual; IDU, injecting drug user; MSM, men who have sex with men; MTCT, mother-to-child transmission; ST, sexual transmission, unspecified type; n/a, not available.

<sup>b</sup>CAR represents Central African Republic.

**Supplementary Table S2. Estimated time to the most recent common ancestor of each HIV-1 CRF01\_AE cluster.**

| <b>CRF01_AE cluster</b>       | <b>Time to the most recent common ancestor in years (median and 95% credibility interval)</b> |
|-------------------------------|-----------------------------------------------------------------------------------------------|
| CRF01_1AE                     | 1995.39 (1994.29, 1996.38)                                                                    |
| CRF01_2AE                     | 1990.71 (1989.93, 1991.49)                                                                    |
| CRF01_3AE                     | 1993.17 (1991.41, 1994.97)                                                                    |
| CRF01_4AE                     | 1993.30 (1992.07, 1994.54)                                                                    |
| CRF01_5AE                     | 1994.89 (1993.57, 1996.10)                                                                    |
| CRF01_6AE                     | 1993.43 (1991.39, 1995.25)                                                                    |
| CRF01_7AE                     | 1998.55 (1997.71, 1999.37)                                                                    |
| CRF01_8AE                     | 1987.50 (1986.24, 1988.86)                                                                    |
| CRF01_9AE                     | 1990.75 (1989.31, 1992.13)                                                                    |
| CRF01_10AE                    | 1998.83 (1998.51, 1999.08)                                                                    |
| TH (Thailand HIV-1 CRF01_AE)  | 1981.45 (1979.92, 1982.89)                                                                    |
| PAN (Pandemic HIV-1 CRF01_AE) | 1983.73 (1982.70, 1984.73)                                                                    |

**Supplementary Table S3. Statistical analysis of the geographic location of CRF01\_AE (China is divided into regions).**

| <b>Statistic</b>           | <b>No. of sequences</b> | <b>Observed mean (95% CI)</b> | <b>Null mean (95% CI)</b> | <b>P-value</b> |
|----------------------------|-------------------------|-------------------------------|---------------------------|----------------|
| AI                         |                         | 18.3 (17.4, 19.1)             | 29.9 (28.1, 31.8)         | <0.001*        |
| PS                         |                         | 125.6 (124.0, 128.0)          | 180.2 (174.0, 186.0)      | <0.001*        |
| MC (AF)                    | 1                       | 1.0 (1.0, 1.0)                | 1.0 (1.0, 1.0)            | N/A            |
| MC (CF)                    | 3                       | 1.8 (1.0, 2.0)                | 1.0 (1.0, 1.0)            | 0.003*         |
| MC (Central of China)      | 2                       | 1.0 (1.0, 1.0)                | 1.0 (1.0, 1.0)            | N/A            |
| MC (Eastern of China)      | 50                      | 2.0 (2.0, 2.0)                | 2.1 (1.5, 3.0)            | 0.804          |
| MC (Northeastern of China) | 43                      | 3.0 (3.0, 3.0)                | 2.0 (1.1, 3.0)            | 0.048*         |
| MC (Southwestern of China) | 59                      | 3.0 (3.0, 3.0)                | 2.3 (2.0, 3.0)            | 0.128          |
| MC (HK)                    | 1                       | 1.0 (1.0, 1.0)                | 1.0 (1.0, 1.0)            | N/A            |
| MC (ID)                    | 1                       | 1.0 (1.0, 1.0)                | 1.0 (1.0, 1.0)            | N/A            |
| MC (JP)                    | 2                       | 2.0 (2.0, 2.0)                | 1.0 (1.0, 1.0)            | 0.002*         |
| MC (TH)                    | 134                     | 40.0 (40.0, 40.0)             | 3.9 (3.0, 5.96)           | 0.001*         |
| MC (US)                    | 5                       | 2.0 (2.0, 2.0)                | 1.0 (1.0, 1.0)            | 0.011*         |
| MC (VN)                    | 33                      | 5.0 (5.0, 5.0)                | 1.7 (1.0, 2.1)            | 0.001*         |

AI, association index.

PS, parsimony score.

MC, monophyletic clade statistic.

95% CI, 95% credibility interval.

\*Statistically significant ( $P < 0.05$ ).

N/A, not available because of the observed 95% CI contains the null 95% CI.



**Supplementary Table S4. Statistical analysis of the geographic location of CRF01\_AE (China is divided into provinces).**

| <b>Statistic</b> | <b>No. of sequences</b> | <b>Observed mean (95% CI)</b> | <b>Null mean (95% CI)</b> | <b><i>P</i>-value</b> |
|------------------|-------------------------|-------------------------------|---------------------------|-----------------------|
| AI               |                         | 19.4 (18.5, 20.3)             | 31.8 (30.0, 33.5)         | <0.001*               |
| PS               |                         | 135.7 (134.0, 138.0)          | 190.4 (185.9, 194.5)      | <0.001*               |
| MC (AF)          | 1                       | 1.0 (1.0, 1.0)                | 1.0 (1.0, 1.0)            | N/A                   |
| MC (CF)          | 3                       | 1.8 (1.0, 2.0)                | 1.0 (1.0, 1.0)            | 0.003*                |
| MC (Beijing)     | 13                      | 2.0 (2.0, 2.0)                | 1.2 (1.0, 2.0)            | 0.077                 |
| MC (Fujian)      | 19                      | 2.0 (2.0, 2.0)                | 1.3 (1.0, 2.0)            | 0.138                 |
| MC (Hebei)       | 2                       | 1.0 (1.0, 1.0)                | 1.0 (1.0, 1.0)            | N/A                   |
| MC (Hunan)       | 2                       | 1.0 (1.0, 1.0)                | 1.0 (1.0, 1.0)            | N/A                   |
| MC (Guangdong)   | 10                      | 2.0 (2.0, 2.0)                | 1.1 (1.0, 2.0)            | 0.04*                 |
| MC (Guangxi)     | 24                      | 3.0 (3.0, 3.0)                | 1.5 (1.0, 2.0)            | 0.009*                |
| MC (Guizhou)     | 6                       | 1.0 (1.0, 1.0)                | 1.0 (1.0, 1.0)            | N/A                   |
| MC (Jiangsu)     | 5                       | 1.0 (1.0, 1.0)                | 1.0 (1.0, 1.0)            | N/A                   |
| MC (Jilin)       | 8                       | 1.2 (1.0, 2.0)                | 1.1 (1.0, 1.8)            | N/A                   |
| MC (Liaoning)    | 35                      | 3.0 (3.0, 3.0)                | 1.8 (1.0, 2.4)            | 0.021*                |
| MC (Sichuan)     | 2                       | 1.0 (1.0, 1.0)                | 1.0 (1.0, 1.0)            | N/A                   |
| MC (Tianjin)     | 1                       | 1.0 (1.0, 1.0)                | 1.0 (1.0, 1.0)            | N/A                   |
| MC (Yunnan)      | 27                      | 1.5 (1.0, 2.0)                | 1.6 (1.0, 2.0)            | N/A                   |
| MC (HK)          | 1                       | 1.0 (1.0, 1.0)                | 1.0 (1.0, 1.0)            | N/A                   |
| MC (ID)          | 1                       | 1.0 (1.0, 1.0)                | 1.0 (1.0, 1.0)            | N/A                   |
| MC (JP)          | 2                       | 2.0 (2.0, 2.0)                | 1.0 (1.0, 1.0)            | 0.004*                |
| MC (TH)          | 134                     | 40.0 (40.0, 40.0)             | 3.9 (3.0, 6.0)            | 0.001*                |
| MC (US)          | 5                       | 2.0 (2.0, 2.0)                | 1.0 (1.0, 1.0)            | 0.006*                |
| MC (VN)          | 33                      | 5.0 (5.0, 5.0)                | 1.7 (1.0, 2.2)            | 0.001*                |

AI, association index.

PS, parsimony score.

MC, monophyletic clade statistic.

95% CI, 95% credibility interval.

\*Statistically significant ( $P < 0.05$ ).

N/A, not available because of the observed 95% CI contains the null 95% CI.

**Supplementary Table S5. Statistical analysis of the geographic location of CRF01\_AE (China and Vietnam are divided into provinces).**

| <b>Statistic</b> | <b>No. of sequences</b> | <b>Observed mean (95% CI)</b> | <b>Null mean (95% CI)</b> | <b>P-value</b> |
|------------------|-------------------------|-------------------------------|---------------------------|----------------|
| AI               |                         | 20.1 (19.3, 21.1)             | 32.2 (30.4, 33.7)         | <0.001*        |
| PS               |                         | 143.8 (141.0, 146.0)          | 192.1 (187.9, 195.9)      | <0.001*        |
| MC (AF)          | 1                       | 1.0 (1.0, 1.0)                | 1.0 (1.0, 1.0)            | N/A            |
| MC (CF)          | 3                       | 1.8 (1.0, 2.0)                | 1.0 (1.0, 1.0)            | 0.003*         |
| MC (Beijing)     | 13                      | 2.0 (2.0, 2.0)                | 1.1 (1.0, 2.0)            | 0.055          |
| MC (Fujian)      | 19                      | 2.0 (2.0, 2.0)                | 1.3 (1.0, 2.0)            | 0.141          |
| MC (Hebei)       | 2                       | 1.0 (1.0, 1.0)                | 1.0 (1.0, 1.0)            | N/A            |
| MC (Hunan)       | 2                       | 1.0 (1.0, 1.0)                | 1.0 (1.0, 1.0)            | N/A            |
| MC (Guangdong)   | 10                      | 2.0 (2.0, 2.0)                | 1.1 (1.0, 1.9)            | 0.031*         |
| MC (Guangxi)     | 24                      | 3.0 (3.0, 3.0)                | 1.4 (1.0, 2.0)            | 0.008*         |
| MC (Guizhou)     | 6                       | 1.0 (1.0, 1.0)                | 1.0 (1.0, 1.0)            | N/A            |
| MC (Jiangsu)     | 5                       | 1.0 (1.0, 1.0)                | 1.0 (1.0, 1.0)            | N/A            |
| MC (Jilin)       | 8                       | 1.2 (1.0, 2.0)                | 1.1 (1.0, 1.5)            | N/A            |
| MC (Liaoning)    | 35                      | 3.0 (3.0, 3.0)                | 1.8 (1.0, 2.2)            | 0.018*         |
| MC (Sichuan)     | 2                       | 1.0 (1.0, 1.0)                | 1.0 (1.0, 1.0)            | N/A            |
| MC (Tianjin)     | 1                       | 1.0 (1.0, 1.0)                | 1.0 (1.0, 1.0)            | N/A            |
| MC (Yunnan)      | 27                      | 1.5 (1.0, 2.0)                | 1.6 (1.0, 2.0)            | N/A            |
| MC (HK)          | 1                       | 1.0 (1.0, 1.0)                | 1.0 (1.0, 1.0)            | N/A            |
| MC (ID)          | 1                       | 1.0 (1.0, 1.0)                | 1.0 (1.0, 1.0)            | N/A            |
| MC (JP)          | 2                       | 2.0 (2.0, 2.0)                | 1.0 (1.0, 1.0)            | 0.002*         |
| MC (TH)          | 134                     | 40.0 (40.0, 40.0)             | 4.0 (2.9, 6.0)            | 0.001*         |
| MC (US)          | 5                       | 2.0 (2.0, 2.0)                | 1.0 (1.0, 1.0)            | 0.008*         |
| MC (An Giang)    | 14                      | 5.0 (5.0, 5.0)                | 1.2 (1.0, 2.0)            | 0.001*         |
| MC (Bac Giang)   | 4                       | 2.0 (2.0, 2.0)                | 1.0 (1.0, 1.0)            | 0.004*         |
| MC (Hai Duong)   | 3                       | 1.0 (1.0, 1.0)                | 1.0 (1.0, 1.0)            | N/A            |
| MC (Ho Chi Minh) | 10                      | 3.0 (3.0, 3.0)                | 1.1 (1.0, 2.0)            | 0.001*         |
| MC (Nam Dinh)    | 2                       | 1.0 (1.0, 1.0)                | 1.0 (1.0, 1.0)            | N/A            |

AI, association index.

PS, parsimony score.

MC, monophyletic clade statistic.

95% CI, 95% credibility interval.

\*Statistically significant ( $P < 0.05$ ).

N/A, not available because of the observed 95% CI contains the null 95% CI.

**Supplementary Table S6. International tourist arrivals to Thailand by Chinese nationals<sup>a</sup>.**

| <b>Year</b> | <b>Number</b> | <b>%Shared<sup>b</sup></b> | <b>%<math>\Delta</math><sup>c</sup></b> | <b>Rank<sup>d</sup></b> |
|-------------|---------------|----------------------------|-----------------------------------------|-------------------------|
| 2014        | 4623806       | 18.66                      | -0.29                                   | 1                       |
| 2013        | 4637335       | 17.47                      | 66.40                                   | 1                       |
| 2012        | 2786860       | 12.47                      | 61.91                                   | 1                       |
| 2011        | 1721247       | 8.95                       | 53.38                                   | 2                       |
| 2010        | 1122219       | 7.04                       | 44.34                                   | 2                       |
| 2009        | 777508        | 5.49                       | -5.95                                   | 4                       |
| 2008        | 826660        | 5.67                       | -8.87                                   | 4                       |
| 2007        | 907117        | 6.27                       | -4.43                                   | 4                       |
| 2006        | 949117        | 6.87                       | 0.22                                    | 4                       |
| 2005        | 776792        | 6.72                       | 6.43                                    | 4                       |
| 2004        | 729848        | 6.22                       | 0.20                                    | 5                       |
| 2003        | 606635        | 6.02                       | -23.98                                  | 5                       |
| 2002        | 797976        | 7.34                       | -0.42                                   | 3                       |
| 2001        | 801362        | 7.91                       | 6.31                                    | 3                       |
| 2000        | 753781        | 7.87                       | -7.35                                   | 3                       |
| 1999        | 813596        | 9.40                       | 34.60                                   | 3                       |
| 1998        | 604472        | 7.71                       | 33.58                                   | 3                       |
| 1997        | 452510        | 6.20                       |                                         | 3                       |

<sup>a</sup>Source of data: Immigration Bureau, Police Department, Thailand.

<sup>b</sup>%Shared: the proportion of international tourist arrivals to Thailand by Chinese nationals.

<sup>c</sup>% $\Delta$ : the difference between the number of current year's and last year's Chinese

<sup>d</sup>Rank: rank China by the source of international tourist arrivals to Thailand.

**Supplementary Table S7. Description of the reference near-complete genome sequences for HIV-1 CRF01\_AE clusters.**

| <b>CRF01_AE cluster</b> | <b>Sequence name</b> | <b>Acc. No.</b> | <b>Sampling year</b> | <b>Sampling Country (origin)</b> | <b>Reference</b>                                       |
|-------------------------|----------------------|-----------------|----------------------|----------------------------------|--------------------------------------------------------|
| CRF01_1AE               | 05GX034              | GQ845124        | 2005                 | China                            | Li, L. <i>ARHR</i> <b>26</b> : 699-704 (2010)          |
| CRF01_2AE               | 97VNHCM310           | FJ185240        | 1997                 | Vietnam                          | Liao, H. <i>Virology</i> <b>391</b> : 51-56 (2009)     |
| CRF01_3AE               | GZ070123             | JX112843        | 2007                 | China                            | Feng, Y. <i>AIDS</i> <b>27</b> : 1793-1802 (2013)      |
| CRF01_4AE               | 07CNYN364            | KF835542        | 2007                 | China                            | Liu, Y. unpublished                                    |
| CRF01_5AE               | AA033a_wg6a          | JX447081        | 2005                 | Thailand                         | Rolland, M. <i>Nature</i> <b>490</b> : 417-420 (2012)  |
| CRF01_6AE               | Fj057                | EF036530        | 2005                 | China                            | Huang, H.L. <i>ARHR</i> <b>23</b> : 569-574 (2007)     |
| CRF01_7AE               | YN0235               | JX112865        | 2002                 | China                            | Feng, Y. <i>AIDS</i> <b>27</b> : 1793-1802 (2013)      |
| CRF01_8AE               | GD070059             | JX112821        | 2007                 | China                            | Feng, Y. <i>AIDS</i> <b>27</b> : 1793-1802 (2013)      |
| CRF01_9AE               | OUR422I              | AY358051        | 1999                 | Thailand                         | Tovanabutra, S. <i>ARHR</i> <b>20</b> : 465-475 (2013) |
| CRF01_10AE              | OUR200I              | AY358066        | 2000                 | Thailand                         | Tovanabutra, S. <i>ARHR</i> <b>20</b> : 465-475 (2013) |
